# Supplementary material for: Medicaid Enrollment and Service Use Among Adults With Down Syndrome
Source: PubMed Central journal article supplement (PMC10422190; doi:10.1001/jamahealthforum.2023.2320), 2023-08-11
Supplement: jamahealthforum-e232320-s001.pdf [file jamahealthforum-e232320-s001.pdf]

## Supplementary Online Content

Rubenstein E, Michals A, Wang N, et al. Medicaid enrollment and service use among adults with Down syndrome. *JAMA Health Forum*. 2023;4(8):e232320.

doi:10.1001/jamahealthforum.2023.2320

**eAppendix 1.** ICD-9 and ICD-10 Codes Used to Identify Down Syndrome and Intellectual Disability

**eAppendix 2.** Additional Data Processing Detail

**eAppendix 3.** STROBE Statement—Checklist of Items That Should be Included in Reports of Cohort Studies

**eTable 1.** Impact of Multiple Imputation on Racial and Ethnic Distribution, by Disability Cohort

**eTable 2.** Sensitivity Analysis Assessing Restricting to States With “Good” Data Quality as Reported by DQ Atlas

**eTable 3.** Main Outcomes by Year to Assess Changes Across Data Collection Practices

This supplementary material has been provided by the authors to give readers additional information about their work.

**eAppendix 1.** ICD-9 and ICD-10 Codes Used to Identify Down Syndrome and Intellectual Disability

|                         | ICD9 | ICD10 |
|-------------------------|------|-------|
| Down syndrome           | 758  | Q90   |
|                         |      | Q90.0 |
|                         |      | Q90.1 |
|                         |      | Q90.2 |
|                         |      | Q90.9 |
| Intellectual disability | F70  | 317   |
|                         | F71  | 318   |
|                         | F72  | 318   |
|                         | F73  | 318.1 |
|                         | F78  | 318.2 |
|                         | F79  | 319   |

## **eAppendix 2.** Additional Data Processing Detail

Data were sent to study team in files by year, where data cleaning relied entirely on source type: MAX or TAF. The two systems were very different in how they were structured, in both size and number of files per source. MAX data structure was smaller (in size and number) than TAF, where data were one file per inpatient, outpatient, long-term care, and medication source. TAF had up to three files per source, requiring data processing to cover multiple files in order to accurately combine measures.

We kept the yearly data structure for demographic cleaning in order to have a full record of yearly data for each individual in our cohort. Using claim lines with a non-missing `bene_id`, we assigned individuals to the DS, AS, and ID cohorts by flagging claims with a predetermined list of ICD codes. We retained individuals in the yearly data by flagging those having 1 or more inpatient claim or 2 or more claims from other sources. The next step was to combine with the random sample group. For demographics, we had CMS-regulated exclusion criteria for age of 18 to 89 years old. In order to QC this, we first cut the PS file for MAX and Demographic file for TAF by these age criteria. Then, we merged this sample to the sub-cohort we created by `bene_id`. All individuals were controlled for age before being brought into the dataset so no restricted ages could be included.

The next step in creating yearly datasets was to combine the MAX and TAF data that was split for years 2014 and 2015, as CMS transitioned to the new data structure during this time. Therefore, we had two files for each year. The biggest QC priority when linking was to consider participants moving within the year. If this happened, there were multiple rows per individual to account for the data recorded in different states. In almost every case, the person's data did not stop being reported at their prior state of residence while also starting and continuing in their current state of residence at the same time (i.e., a person would have up to 2 states claiming they were enrolled at once). For this reason, processing insurance/MCO categorizations, eligibility types, and dual enrollment required careful attention and cross referencing. We used non-missing data for the most important demographic information, i.e. DS, AS, ID indicators and counts, race, gender, and age. For all other variables (enrollment months, eligibility type, medically needy, MCO ever, etc.), we used the most recent data available. Variables that were counts, like enrollment months, were summed between the data.

Demographics were created by cross referencing the CMS provided data dictionaries for MAX and TAF to ensure the most similar variables were being used to calculate the same derived variables. The largest portion of QC at this stage was comparing the two sources for the creation of derived variables. All derived variables were structured/created the same across data sources for use in analysis. A main difference between the data structures was that TAF reported more monthly measurements, MAX reported more annual measurements, and depending on the variable, one system would require a measurement to be calculated while the other contained it in the raw data. For example, age needed to be calculated in MAX but is included as a demographic variable in TAF. We needed to ensure how CMS calculated variables that MAX did not contain, or vice versa, to ensure accurate measurement of demographics between the two.

Our demographics were based on the first year of recorded claims for that individual. However, due to the nature of the conditions we focused on, we categorized our cohort groups as ever having them indicated in their data over the nine years (if someone was ever flagged for DS codes, they were categorized as such for the study period). During demographic data cleaning, we discovered that some individuals had multiple races and ethnicities reported throughout the years. We cleaned this by flagging any individual with more than one race listed and categorizing them as 'Multiple Races', saving the listed races as variables for use in later sensitivity analyses. Additionally, if someone's first year of data listed race as 'Unknown/Missing' but listed a constant known race for later years, we used the race indicated in later years. For ethnicity, we considered with any indication of Hispanic ethnicity to have Hispanic ethnicity regardless of ever having reported white ethnicity. However, if they did have both, we created a flag for future sensitivity analyses. There were many individuals whose claims were missing sex categorizations. To clean this if a person's first year of data was missing this variable but later years were not, we used the first non-missing data available.

For analysis of claims, costs, and visits, the measures were calculated by CMS and contained in the MAX PS file. For TAF, these measures needed to be hand calculated across all data sources. In order to QC total claims, costs, inpatient hospitalizations, and long-term care days in TAF and ensure the two data types were processed the same way, we replicated the entire program used to calculate TAF to hand calculate the same variables in MAX, since

they were supplied by CMS. We aggregated the applicable data from all file types to sum these measures by person, then compared the total mean and other descriptive to that of the descriptive in the PS file. Once we confirmed this method gave near identical results as the data given by CMS, we processed all TAF data this way. In order to remove outliers, we used the formula  $[\text{mean}+2(\text{standard deviation})]$  for the upper limit. The maximum number of outliers removed was ~200 for any given year.

In order to accurately calculate total cost across data types (IP, OP, LTC, and Rx), we wanted a way to QC our programming to replicate what the summary file, PS, for MAX reports. For total costs, MAX provided yearly totals (i.e. aggregate costs for entire year) in the PS dataset. TAF did not supply any aggregate data, meaning we needed to sum claim counts, cost, IP stays, and LTC days by hand. To QC this for TAF, after building the program to sum these variables in each TAF dataset, we processed the separate MAX files using the same program to know how close our method was to what CMS used to report the yearly totals. We compared the distributions of the PS dataset for claim count, cost, IP and LTC days to the distributions calculated from the TAF program and found they were only different by a maximum of 1.6 for claim count, \$323.7 for cost and 0.02 for IP stays. The LTC day count was the same. Since our TAF program compiled so closely to the MAX summary distributions, our processing plan was the best method.

**MAX 2011 Table 3 Distributions: Using PS File**

| Label               | N       | Mean        | Std Dev     | Minimum      | Maximum     |
|---------------------|---------|-------------|-------------|--------------|-------------|
| Total Claims 2011   | 2503444 | 124.1945192 | 191.2165387 | 0            | 4769.00     |
| Total Cost 2011     | 2503444 | 24272.99    | 59668.42    | 0            | 6666714.00  |
| Total IP Stays 2011 | 2503444 | 0.1803104   | 0.9228653   | 0            | 153.0000000 |
| Total LTC Days 2011 | 182414  | 268.3598189 | 162.1505457 | -360.0000000 | 4614.00     |

**MAX 2011 Table 3 Distributions: manually created using IP, LTC, OP, Rx files  
(QC/TAF Method)**

| Total Claims 11 QC   | 2471108 | 125.8195696 | 191.9315819 | 0            | 4769.00     |
|----------------------|---------|-------------|-------------|--------------|-------------|
| Total Cost 11 QC     | 2471107 | 24596.70    | 59992.81    | 0            | 6666714.00  |
| Total IP Stays 11 QC | 2470845 | 0.1608814   | 0.7327922   | 0            | 133.0000000 |
| Total LTC Days 11 QC | 182414  | 268.3598189 | 162.1505457 | -360.0000000 | 4614.00     |

To accurately calculate total cost across data types (IP, OP, LTC, and Rx), we wanted a way to QC our programming to replicate what the summary file, PS, for MAX reports. For total costs, MAX provided yearly totals (i.e., aggregate costs for entire year) in the PS dataset. TAF did not supply any aggregate data, meaning we needed to sum claim counts, cost, IP stays, and LTC days by hand. To QC this for TAF, after building the program to sum these variables in each TAF dataset, we processed the separate MAX files using the same program to know how close our method was to what CMS used to report the yearly totals. We compared the distributions of the PS dataset for claim count, cost, IP and LTC days to the distributions calculated from the TAF program and found they were only different by a maximum of 1.6 for claim count, \$323.7 for cost and 0.02 for IP stays. The LTC day count was the same. Since our TAF program compiled so closely to the MAX summary distributions, our processing plan was the best method.

We then adjusted each year's total cost for inflation by using historical, national CPI data for the years 2011-2019. Total costs for each year were adjusted by that year's CPI using  $[\text{cost}*(1+\text{inflation rate})]$ . We also standardized by age using DS cohort's age category frequencies for each year of data. We calculated the frequencies of age categories for the DS cohort by year, then multiplied the total measures (cost, claims, IP stays, long-term care days) by the percent in the corresponding age strata for all other cohort groups.

### eAppendix 3. STROBE Statement—Checklist of Items That Should be Included in Reports of Cohort Studies

|                           | Item No | Recommendation                                                                                                                                                                                                    | Page No |
|---------------------------|---------|-------------------------------------------------------------------------------------------------------------------------------------------------------------------------------------------------------------------|---------|
| <b>Title and abstract</b> | 1       | (a) Indicate the study's design with a commonly used term in the title or the abstract                                                                                                                            | 1       |
|                           |         | (b) Provide in the abstract an informative and balanced summary of what was done and what was found                                                                                                               | 3       |
| <b>Introduction</b>       |         |                                                                                                                                                                                                                   |         |
| Background/rationale      | 2       | Explain the scientific background and rationale for the investigation being reported                                                                                                                              | 5-6     |
| Objectives                | 3       | State specific objectives, including any prespecified hypotheses                                                                                                                                                  | 7       |
| <b>Methods</b>            |         |                                                                                                                                                                                                                   |         |
| Study design              | 4       | Present key elements of study design early in the paper                                                                                                                                                           | 8       |
| Setting                   | 5       | Describe the setting, locations, and relevant dates, including periods of recruitment, exposure, follow-up, and data collection                                                                                   | 8       |
| Participants              | 6       | (a) Give the eligibility criteria, and the sources and methods of selection of participants. Describe methods of follow-up<br>(b) For matched studies, give matching criteria and number of exposed and unexposed | 8       |
| Variables                 | 7       | Clearly define all outcomes, exposures, predictors, potential confounders, and effect modifiers. Give diagnostic criteria, if applicable                                                                          | 9-11    |
| Data sources/measurement  | 8*      | For each variable of interest, give sources of data and details of methods of assessment (measurement). Describe comparability of assessment methods if there is more than one group                              | 9       |
| Bias                      | 9       | Describe any efforts to address potential sources of bias                                                                                                                                                         | 11      |
| Study size                | 10      | Explain how the study size was arrived at                                                                                                                                                                         | n/a     |
| Quantitative variables    | 11      | Explain how quantitative variables were handled in the analyses. If applicable, describe which groupings were chosen and why                                                                                      | 11      |
| Statistical methods       | 12      | (a) Describe all statistical methods, including those used to control for confounding                                                                                                                             | 11      |
|                           |         | (b) Describe any methods used to examine subgroups and interactions                                                                                                                                               | 11      |
|                           |         | (c) Explain how missing data were addressed                                                                                                                                                                       | 9       |
|                           |         | (d) If applicable, explain how loss to follow-up was addressed                                                                                                                                                    |         |
|                           |         | (e) Describe any sensitivity analyses                                                                                                                                                                             | 11      |
| <b>Results</b>            |         |                                                                                                                                                                                                                   |         |
| Participants              | 13*     | (a) Report numbers of individuals at each stage of study—eg numbers potentially eligible, examined for eligibility, confirmed eligible, included in the study, completing follow-up, and analysed                 | 12-13   |
|                           |         | (b) Give reasons for non-participation at each stage                                                                                                                                                              | n/a     |
|                           |         | (c) Consider use of a flow diagram                                                                                                                                                                                | n/a     |
| Descriptive data          | 14*     | (a) Give characteristics of study participants (eg demographic, clinical, social) and information on exposures and potential confounders                                                                          | 13, 22  |
|                           |         | (b) Indicate number of participants with missing data for each variable of interest                                                                                                                               | 22      |
|                           |         | (c) Summarise follow-up time (eg, average and total amount)                                                                                                                                                       | 22      |
| Outcome data              | 15*     | Report numbers of outcome events or summary measures over time                                                                                                                                                    | 23      |

|                          |    |                                                                                                                                                                                                                                                                                                                                                                                                               |       |
|--------------------------|----|---------------------------------------------------------------------------------------------------------------------------------------------------------------------------------------------------------------------------------------------------------------------------------------------------------------------------------------------------------------------------------------------------------------|-------|
| Main results             | 16 | (a) Give unadjusted estimates and, if applicable, confounder-adjusted estimates and their precision (eg, 95% confidence interval). Make clear which confounders were adjusted for and why they were included<br>(b) Report category boundaries when continuous variables were categorized<br>(c) If relevant, consider translating estimates of relative risk into absolute risk for a meaningful time period | 23    |
| Other analyses           | 17 | Report other analyses done—eg analyses of subgroups and interactions, and sensitivity analyses                                                                                                                                                                                                                                                                                                                | 14    |
| <b>Discussion</b>        |    |                                                                                                                                                                                                                                                                                                                                                                                                               |       |
| Key results              | 18 | Summarise key results with reference to study objectives                                                                                                                                                                                                                                                                                                                                                      | 14    |
| Limitations              | 19 | Discuss limitations of the study, taking into account sources of potential bias or imprecision. Discuss both direction and magnitude of any potential bias                                                                                                                                                                                                                                                    | 15    |
| Interpretation           | 20 | Give a cautious overall interpretation of results considering objectives, limitations, multiplicity of analyses, results from similar studies, and other relevant evidence                                                                                                                                                                                                                                    | 15-17 |
| Generalisability         | 21 | Discuss the generalisability (external validity) of the study results                                                                                                                                                                                                                                                                                                                                         | 15    |
| <b>Other information</b> |    |                                                                                                                                                                                                                                                                                                                                                                                                               |       |
| Funding                  | 22 | Give the source of funding and the role of the funders for the present study and, if applicable, for the original study on which the present article is based                                                                                                                                                                                                                                                 | 18    |

\*Give information separately for exposed and unexposed groups.

**Note:** An Explanation and Elaboration article discusses each checklist item and gives methodological background and published examples of transparent reporting. The STROBE checklist is best used in conjunction with this article (freely available on the Web sites of PLoS Medicine at <http://www.plosmedicine.org/>, Annals of Internal Medicine at <http://www.annals.org/>, and Epidemiology at <http://www.epidem.com/>). Information on the STROBE Initiative is available at <http://www.strobe-statement.org>.

**eTable 1.** Impact of Multiple Imputation on Racial and Ethnic Distribution, by Disability Cohort

|                  |                        | Non-imputed %             |                                      |                            | Imputed %, ( $\Delta$ in %) |                         |               |
|------------------|------------------------|---------------------------|--------------------------------------|----------------------------|-----------------------------|-------------------------|---------------|
|                  |                        | Down syndrome<br>N=123024 | Intellectual disability<br>N=1182246 | Random sample<br>N=3176371 | Down syndrome               | Intellectual disability | Random sample |
| <b>Race</b>      | Asian                  | 2.6                       | 1.9                                  | 5.4                        | 3.4 (0.8)                   | 2.6 (0.7)               | 6.1 (0.7)     |
|                  | Black                  | 13.9                      | 23.1                                 | 26.1                       | 14.1 (0.2)                  | 22.0 (-1.1)             | 23.7 (-2.4)   |
|                  | Native American        | 1.0                       | 1.0                                  | 1.7                        | 5.9 (4.9)                   | 4.4 (3.4)               | 5.4 (3.7)     |
|                  | Pacific Islander       | 0.4                       | 0.4                                  | 1.0                        | 0.9 (0.5)                   | 0.8 (0.4)               | 1.3 (0.3)     |
|                  | Multiple Races         | 1.4                       | 1.7                                  | 1.3                        | 1.1 (0.5)                   | 0.8 (0.4)               | 2.2 (0.9)     |
|                  | White                  | 80.5                      | 72.1                                 | 64.4                       | 74.6 (-5.9)                 | 69.5 (-2.6)             | 61.3 (-3.1)   |
|                  | Unknown or missing (N) | 28,920                    | 198,854                              | 951,201                    | 3,829                       | 46,232                  | 120,877       |
| <b>Ethnicity</b> | Hispanic/Latino        | 17.1                      | 11.7                                 | 21.4                       | 16.7 (0.4)                  | 11.7 (0.0)              | 20.7 (-0.7)   |
|                  | Non-Hispanic/Latino    | 82.3                      | 88.3                                 | 78.5                       | 83.3 (1.0)                  | 88.3 (0.0)              | 79.3 (0.8)    |
|                  | Unknown or missing (N) | 14,883                    | 133,400                              | 426,578                    | 3,829                       | 46,232                  | 120,877       |

**eTable 2.** Sensitivity Analysis Assessing Restricting to States With “Good” Data Quality as Reported by DQ Atlas

| Claim count (per person year) | Down syndrome |            |              | Intellectual disability |            |              | Non Developmental disability |            |              |
|-------------------------------|---------------|------------|--------------|-------------------------|------------|--------------|------------------------------|------------|--------------|
|                               | Full          | Restricted | % Difference | Full                    | Restricted | % Difference | Full                         | Restricted | % Difference |
| 2014                          | 224.5         | 225.9      | 0.6          | 240.8                   | 242        | 0.5          | 61.3                         | 61.5       | 0.3          |
| 2015                          | 218.9         | 220.3      | 0.6          | 232.9                   | 235.8      | 1.2          | 55.7                         | 55.2       | 0.9          |
| 2016                          | 202.3         | 214.3      | 5.9          | 216.5                   | 223        | 3.0          | 58.8                         | 59.7       | 1.5          |
| 2017                          | 208.8         | 206.9      | 0.9          | 222.1                   | 222.5      | 0.2          | 61.9                         | 66.4       | 7.3          |
| 2018                          | 221.3         | 217.4      | 1.8          | 232.7                   | 230.6      | 0.9          | 64.3                         | 68.8       | 7.0          |
| 2019                          | 231.0         | 214.5      | 7.1          | 241.8                   | 231.9      | 4.1          | 65.5                         | 66.8       | 2.0          |
| <b>Cost (\$)</b>              |               |            |              |                         |            |              |                              |            |              |
| 2014                          | 43545         | 45634      | 4.8          | 52812                   | 53861      | 1.99         | 7292                         | 7589       | 4.1          |
| 2015                          | 45237         | 51129      | 13.0         | 53304                   | 56213.6    | 5.46         | 6840                         | 7305.9     | 6.8          |
| 2016                          | 42328         | 47910      | 13.2         | 51134                   | 55310      | 8.17         | 7167                         | 7778.7     | 8.5          |
| 2017                          | 45232         | 44860      | 0.8          | 54147                   | 52734.8    | 2.61         | 7702                         | 8104.1     | 5.2          |
| 2018                          | 47858         | 51677      | 8.0          | 57627                   | 59340.9    | 2.97         | 8266                         | 8743.1     | 5.8          |
| 2019                          | 49927         | 49997      | 0.1          | 60447                   | 61093      | 1.07         | 8803                         | 8620.2     | 2.1          |

Groups are not age standardized and costs are not adjusted for inflation



**eTable 3.** Main Outcomes by Year to Assess Changes Across Data Collection Practices

|                            | Down Syndrome |       |           | Intellectual Disability |       |           | Random Sample |       |           |
|----------------------------|---------------|-------|-----------|-------------------------|-------|-----------|---------------|-------|-----------|
|                            | Mean PY       | SD    | Median PY | Mean PY                 | SD    | Median PY | Mean PY       | SD    | Median PY |
| Claims                     |               |       |           |                         |       |           |               |       |           |
| 2011                       | 202           | 237   | 104       | 218                     | 251   | 119       | 62            | 108   | 27        |
| 2012                       | 212           | 245   | 114       | 230                     | 256   | 130       | 66            | 113   | 30        |
| 2013                       | 216           | 239   | 119       | 236                     | 257   | 136       | 68            | 115   | 31        |
| 2014                       | 222           | 254   | 118       | 241                     | 264   | 134       | 61            | 105   | 29        |
| 2015                       | 215           | 248   | 111       | 233                     | 262   | 127       | 56            | 95    | 26        |
| 2016                       | 202           | 229   | 114       | 217                     | 243   | 126       | 59            | 89    | 34        |
| 2017                       | 209           | 223   | 122       | 222                     | 238   | 133       | 62            | 88    | 36        |
| 2018                       | 221           | 231   | 133       | 233                     | 242   | 142       | 64            | 93    | 36        |
| 2019                       | 231           | 239   | 138       | 242                     | 250   | 147       | 66            | 97    | 37        |
| Medicaid Paid Costs        |               |       |           |                         |       |           |               |       |           |
| 2011                       | 43038         | 54698 | 26368     | 54402                   | 93527 | 30525     | 7905          | 20430 | 2231      |
| 2012                       | 42714         | 52921 | 27732     | 53568                   | 90552 | 30908     | 7920          | 20005 | 2337      |
| 2013                       | 42052         | 47978 | 27596     | 51750                   | 65828 | 31218     | 7955          | 19037 | 2374      |
| 2014                       | 44165         | 56312 | 27090     | 53647                   | 72159 | 30280     | 7411          | 17863 | 2662      |
| 2015                       | 44601         | 61488 | 24211     | 53407                   | 72955 | 27730     | 6849          | 17415 | 2597      |
| 2016                       | 42861         | 49733 | 26891     | 51779                   | 62957 | 30239     | 7257          | 19339 | 2965      |
| 2017                       | 46196         | 51185 | 31511     | 55300                   | 66228 | 34202     | 7867          | 20271 | 3271      |
| 2018                       | 49026         | 54652 | 34410     | 59033                   | 69088 | 37374     | 8468          | 22080 | 3530      |
| 2019                       | 50831         | 56689 | 34870     | 61541                   | 71510 | 39520     | 8963          | 24850 | 3703      |
| Inpatient Hospitalizations |               |       |           |                         |       |           |               |       |           |
| 2011                       | 0.16          | 0.68  | 0         | 0.23                    | 1.10  | 0         | 0.21          | 0.96  | 0         |
| 2012                       | 0.17          | 1.16  | 0         | 0.23                    | 1.19  | 0         | 0.21          | 1.08  | 0         |
| 2013                       | 0.17          | 0.87  | 0         | 0.23                    | 1.20  | 0         | 0.21          | 1.08  | 0         |
| 2014                       | 0.17          | 1.20  | 0         | 0.22                    | 1.42  | 0         | 0.18          | 1.35  | 0         |
| 2015                       | 0.16          | 0.61  | 0         | 0.23                    | 0.99  | 0         | 0.15          | 0.72  | 0         |
| 2016                       | 0.17          | 0.57  | 0         | 0.23                    | 0.88  | 0         | 0.15          | 0.64  | 0         |
| 2017                       | 0.18          | 0.59  | 0         | 0.24                    | 0.86  | 0         | 0.15          | 0.62  | 0         |
| 2018                       | 0.18          | 0.59  | 0         | 0.24                    | 0.88  | 0         | 0.14          | 0.61  | 0         |
| 2019                       | 0.19          | 0.64  | 0         | 0.25                    | 0.94  | 0         | 0.14          | 0.60  | 0         |
| Days in Long-Term Care     |               |       |           |                         |       |           |               |       |           |
| 2011                       | 23            | 86    | 0         | 31                      | 104   | 0         | 3             | 28    | 0         |
| 2012                       | 23            | 89    | 0         | 30                      | 105   | 0         | 3             | 31    | 0         |
| 2013                       | 23            | 87    | 0         | 30                      | 102   | 0         | 3             | 29    | 0         |
| 2014                       | 25            | 99    | 0         | 32                      | 111   | 0         | 3             | 34    | 0         |
| 2015                       | 24            | 103   | 0         | 31                      | 118   | 0         | 3             | 36    | 0         |
| 2016                       | 28            | 130   | 0         | 39                      | 156   | 0         | 3             | 43    | 0         |
| 2017                       | 27            | 122   | 0         | 38                      | 148   | 0         | 3             | 42    | 0         |
| 2018                       | 28            | 125   | 0         | 40                      | 151   | 0         | 3             | 41    | 0         |
| 2019                       | 24            | 117   | 0         | 37                      | 144   | 0         | 3             | 40    | 0         |

White: MAX data

Light gray: MAX-TAF transition

Dark gray: TAF data
