# Supplementary material for: Medicaid Enrollment and Service Use Among Adults With Down Syndrome
Source: PubMed Central journal article supplement (PMC10422190; doi:10.1001/jamahealthforum.2023.2320), 2023-08-11
Supplement: jamahealthforum-e232320-s002.pdf [file jamahealthforum-e232320-s002.pdf]

## Data Sharing Statement

Rubenstein. Medicaid Enrollment and Service Use Among Adults With Down Syndrome. *JAMA Health Forum*. Published August 11, 2023. doi:10.1001/jamahealthforum.2023.2320

### Data

**Data available:** No

### Additional Information

**Explanation for why data not available:** Data are used under a Data Use Agreement with the Center for Medicare and Medicaid Systems which does not allow data sharing. We can share a data dictionary but cannot share individual patient data
